# Supplementary material for: Contemporary Dietary Intake: Too Much Sodium, Not Enough Potassium, yet Sufficient Iodine: The SALMEX Cohort Results
Source: MDPI journal article supplement (doi:10.3390/nu10070816), 2018-06-25
Supplement: s1 [file s1]

**Table S1:** SALMEX Study sodium intake detection questionnaire (Translated from Spanish).

| Information     |                            |                                                                                                                                                                                                             |
|-----------------|----------------------------|-------------------------------------------------------------------------------------------------------------------------------------------------------------------------------------------------------------|
| Date and origin |                            | Answer                                                                                                                                                                                                      |
| 1               | Delegation or municipality |                                                                                                                                                                                                             |
| 2               | Interviewer ID             |                                                                                                                                                                                                             |
| 3               | Date                       | <div> <div> <div></div><div></div><div></div> </div> <div> <div></div><div></div><div></div> </div> <div> <div></div><div></div><div></div><div></div><div></div> </div> </div> <div> Day Month Year </div> |

| Infomed Consent and Name |                                   | Answer                                                                                                            |
|--------------------------|-----------------------------------|-------------------------------------------------------------------------------------------------------------------|
| 4                        | Infomed consent was read          | Yes (1) <input type="checkbox"/><br>No (0) <input type="checkbox"/> <b>If answer is NO, read informed consent</b> |
| 5                        | Language                          | Spanish <input checked="" type="checkbox"/>                                                                       |
| 6                        | Time of interview                 | Hour: minute <div><div></div><div></div></div> : <div><div></div><div></div></div>                                |
| 7                        | Last name                         |                                                                                                                   |
| 8                        | First name(s)                     |                                                                                                                   |
| Additional information   |                                   |                                                                                                                   |
| 9                        | Telephone number (when available) |                                                                                                                   |

| DEMOGRAPHIC INFORMATION |                                            |                                                                                                                                                                                                             |                                                                                                                                                                                                  |
|-------------------------|--------------------------------------------|-------------------------------------------------------------------------------------------------------------------------------------------------------------------------------------------------------------|--------------------------------------------------------------------------------------------------------------------------------------------------------------------------------------------------|
| Question                |                                            | Answer                                                                                                                                                                                                      |                                                                                                                                                                                                  |
| 1                       | Sex                                        | Male (1) <input type="checkbox"/>                                                                                                                                                                           |                                                                                                                                                                                                  |
| 0                       |                                            | Female (0) <input type="checkbox"/>                                                                                                                                                                         |                                                                                                                                                                                                  |
| 1                       | Place of birth                             | <div> <div> <div></div><div></div><div></div> </div> <div> <div></div><div></div><div></div> </div> <div> <div></div><div></div><div></div><div></div><div></div> </div> </div> <div> Day Month Year </div> |                                                                                                                                                                                                  |
| 1                       | <i>If unknown, leave blank</i>             |                                                                                                                                                                                                             |                                                                                                                                                                                                  |
| 1                       | What is your highest educational level?    | No formal schooling (1)<br>Elementary school (2)<br>Middle school (3)<br>Highschool (4)<br>Undergraduate studies (college or university) (5)<br>Graduate studies (6)<br>Refuses to answer (7)               | <input type="checkbox"/><br><input type="checkbox"/><br><input type="checkbox"/><br><input type="checkbox"/><br><input type="checkbox"/><br><input type="checkbox"/><br><input type="checkbox"/> |
| 1                       | What is your marital status?               | Never married (1)<br>Married (2)<br>Separated (3)<br>Divorced (4)<br>Widowed (5)<br>Living in union (6)<br>Refuses to answer (88)                                                                           | <input type="checkbox"/><br><input type="checkbox"/><br><input type="checkbox"/><br><input type="checkbox"/><br><input type="checkbox"/><br><input type="checkbox"/><br><input type="checkbox"/> |
| 1                       | Describe your main job in this institution | Department                                                                                                                                                                                                  |                                                                                                                                                                                                  |
| 4                       | for the last 12 months.                    | Position                                                                                                                                                                                                    |                                                                                                                                                                                                  |

|  |  |  |
|--|--|--|
|  |  |  |
|--|--|--|

| TOBACCO CONSUMPTION |                                                                    |                                                                                                          |
|---------------------|--------------------------------------------------------------------|----------------------------------------------------------------------------------------------------------|
| Question            | Answer                                                             |                                                                                                          |
| 15                  | Do you currently smoke any tobacco related product?                | Yes <input type="checkbox"/> (1) No <input type="checkbox"/> (0)                                         |
| 16                  | Do you currently smoke daily?                                      | Yes <input type="checkbox"/> (1) No <input type="checkbox"/> (0)                                         |
| 17                  | At what age did you start smoking?                                 | Age (years) <input type="text"/> <input type="text"/><br>Doesn't know <input type="checkbox"/>           |
| 18                  | In average, how many of these tobacco products do you smoke daily? | Cigarettes <input type="text"/> <input type="text"/><br>Cigars <input type="text"/> <input type="text"/> |
| 19                  | In the past, did you ever smoke daily?                             | Yes <input type="checkbox"/> (1) No <input type="checkbox"/> (0)                                         |
| 20                  | At what age did you stop smoking daily?                            | Age (años) <input type="text"/> <input type="text"/><br>Doesn't know <input type="checkbox"/>            |

| ALCOHOL CONSUMPTION |                                                                                                                              |                                                                                                                                                                                                                                                                                  |
|---------------------|------------------------------------------------------------------------------------------------------------------------------|----------------------------------------------------------------------------------------------------------------------------------------------------------------------------------------------------------------------------------------------------------------------------------|
| Question            | Answer                                                                                                                       |                                                                                                                                                                                                                                                                                  |
| 21                  | Have you ever consumed any alcoholic beverage?                                                                               | Yes <input type="checkbox"/> (1) No <input type="checkbox"/> (0)<br><i>If NO, go to next section (DIET)</i>                                                                                                                                                                      |
| 22                  | Have you consumed any alcoholic beverage in the last 12 months?                                                              | Yes <input type="checkbox"/> (1)<br>No <input type="checkbox"/> (0)                                                                                                                                                                                                              |
| 23                  | During the last 12 months, how frequently did you consume any alcoholic beverage?                                            | Daily <input type="checkbox"/> (1)<br>5-6 days a week <input type="checkbox"/> (2)<br>1-4 days a week <input type="checkbox"/> (3)<br>1-3 days a month <input type="checkbox"/> (4)<br>Less than once a month <input type="checkbox"/> (5)<br>Never <input type="checkbox"/> (6) |
| 24                  | Have you consumed any alcoholic beverage in the last 30 days?                                                                | Yes <input type="checkbox"/> (1)<br>No <input type="checkbox"/> (0)<br><i>If NO, go to next section (DIET)</i>                                                                                                                                                                   |
| 25                  | During the last 30 days, how many times did you consume at least one alcoholic beverage?                                     | Number of Days <input type="text"/> <input type="text"/><br>Doesn't know <input type="checkbox"/>                                                                                                                                                                                |
| 26                  | During the last 30 days, when consuming alcoholic beverages, how many drinks did you consume in average per day?             | Number of beverages <input type="text"/> <input type="text"/><br>Doesn't know <input type="checkbox"/>                                                                                                                                                                           |
| 27                  | During the last 30 days, what was the highest number of drinks you had in one day, including any type of alcoholic beverage? | Number of beverages <input type="text"/> <input type="text"/><br>Doesn't know <input type="checkbox"/>                                                                                                                                                                           |

|    |                                                                                                                                |                                                                                                                                                                                                                                                                                                                                                                                  |
|----|--------------------------------------------------------------------------------------------------------------------------------|----------------------------------------------------------------------------------------------------------------------------------------------------------------------------------------------------------------------------------------------------------------------------------------------------------------------------------------------------------------------------------|
| 28 | During the last 30 days, how many times did you consume five or more drinks (men) or four or more drinks (women)?              | Number of days <input type="text"/> <input type="text"/><br>Doesn't know <input type="checkbox"/>                                                                                                                                                                                                                                                                                |
| 29 | During the last 30 days, when consuming an alcoholic beverage, how many times did you do it with food? (do not include snacks) | Usually with food <input type="checkbox"/> (1)<br>Sometimes with food <input type="checkbox"/> (2)<br>Rarely with food <input type="checkbox"/> (3)<br>Never with food <input type="checkbox"/> (4)<br>Hasn't consumed alcohol <input type="checkbox"/> (5)                                                                                                                      |
| 30 | During the last 7 days, how many drinks of any alcoholic beverage did you have for any given day?                              | Monday <input type="text"/> <input type="text"/><br>Tuesday <input type="text"/> <input type="text"/><br>Wednesday <input type="text"/> <input type="text"/><br>Thursday <input type="text"/> <input type="text"/><br>Friday <input type="text"/> <input type="text"/><br>Saturday <input type="text"/> <input type="text"/><br>Sunday <input type="text"/> <input type="text"/> |

| DIET              |                                                             |                                                                                                                                                                  |
|-------------------|-------------------------------------------------------------|------------------------------------------------------------------------------------------------------------------------------------------------------------------|
| Question          | Answer                                                      |                                                                                                                                                                  |
| 31                | During a typical week, how many days do you eat fruit?      | Number of days <input type="text"/> <input type="text"/><br>Doesn't know <input type="checkbox"/>                                                                |
| 32                | How many portions of fruit do you eat for each day?         | Number of <input type="text"/> <input type="text"/><br>portions<br>Doesn't know                                                                                  |
| 33                | During a typical week, how many days do you eat vegetables? | Number of days <input type="text"/> <input type="text"/><br>Doesn't know <input type="checkbox"/>                                                                |
| 34                | How many portions of vegetables do you eat for each day?    | Number of <input type="text"/> <input type="text"/><br>portions<br>Doesn't know <input type="checkbox"/>                                                         |
| 35                | What kind of oil or fat do you use to prepare food?         | Vegetable oil <input type="checkbox"/> (1)<br>Lard <input type="checkbox"/> (2)<br>Butter <input type="checkbox"/> (3)<br>Margarine <input type="checkbox"/> (4) |
| PHYSICAL ACTIVITY |                                                             |                                                                                                                                                                  |
| Question          | Answer                                                      |                                                                                                                                                                  |

| During job hours                                     |                                                                                                                                                                                       |                                                                                                                                                                                                                                                                                                                                                                                     |
|------------------------------------------------------|---------------------------------------------------------------------------------------------------------------------------------------------------------------------------------------|-------------------------------------------------------------------------------------------------------------------------------------------------------------------------------------------------------------------------------------------------------------------------------------------------------------------------------------------------------------------------------------|
| 45                                                   | Does your job imply carrying out intense physical activity that accelerates your breathing or heart rate (such as lifting weight, shoveling, construction) for at least 10 minutes?   | Yes <input type="checkbox"/> None in particular (6)<br>(1) Doesn't use <input type="checkbox"/> (7)<br>No <input type="checkbox"/> Does (1) know <input type="checkbox"/> (8)                                                                                                                                                                                                       |
| 46                                                   | During a typical work week, how many days do you have to carry out intense physical activity during work?                                                                             | Number of days <input type="text"/> of days <input type="text"/><br>Doesn't know                                                                                                                                                                                                                                                                                                    |
| 47                                                   | During one of these days, how much time do you spend doing intense physical activity?                                                                                                 | Hours: <input type="text"/> Minutes: <input type="text"/>                                                                                                                                                                                                                                                                                                                           |
| Knowledge, attitude, behaviour towards salt in diet. |                                                                                                                                                                                       |                                                                                                                                                                                                                                                                                                                                                                                     |
| 48                                                   | Does your job imply carrying out moderate physical activity that slightly accelerates your breathing or heart rate (such as walking, carrying light weights) for at least 10 minutes? | Yes <input type="checkbox"/> <b>Answer</b><br>(1) Never <input type="checkbox"/> (0)<br>No <input type="checkbox"/> (0)<br>Rarely <input type="checkbox"/> (1)<br>Occasionally <input type="checkbox"/> (2)                                                                                                                                                                         |
| 37                                                   | Do you add salt to your food at the table?<br>(Choose one)                                                                                                                            | Always <input type="checkbox"/> (4)<br>Hours: <input type="text"/> Minutes: <input type="text"/><br>Never <input type="checkbox"/> (0)<br>Rarely <input type="checkbox"/> (1)                                                                                                                                                                                                       |
| 49                                                   | During a typical work week, how many days do you have to carry out moderate physical activity during work?                                                                            | Usually <input type="checkbox"/> (3) days<br>Number of days <input type="text"/>                                                                                                                                                                                                                                                                                                    |
| 50                                                   | During one of these days, how much time do you spend doing moderate physical activity?                                                                                                | Always <input type="checkbox"/> (4)<br>Hours: <input type="text"/> Minutes: <input type="text"/><br>Never <input type="checkbox"/> (0)<br>Rarely <input type="checkbox"/> (1)                                                                                                                                                                                                       |
| 38                                                   | Do you add salt to your food when cooking?<br>(Choose one)                                                                                                                            | Rarely <input type="checkbox"/> (1)                                                                                                                                                                                                                                                                                                                                                 |
| Transportation to your job                           |                                                                                                                                                                                       |                                                                                                                                                                                                                                                                                                                                                                                     |
| 51                                                   | Do you walk or use bicycle for at least 10 straight minutes to get to work?                                                                                                           | Usually <input type="checkbox"/> (6)<br>Yes <input type="checkbox"/><br>Always <input type="checkbox"/> (4)<br>(1) Excessive <input type="checkbox"/> (1)<br>No <input type="checkbox"/> (0)<br>High <input type="checkbox"/> (2)                                                                                                                                                   |
| 39                                                   | How much salt do you think you consume?<br>(Choose one)                                                                                                                               | Recommended <input type="checkbox"/> (3)                                                                                                                                                                                                                                                                                                                                            |
| 52                                                   | How many days a week do you walk or use bicycle for at least 10 straight minutes to get to work?                                                                                      | Little Number of days <input type="text"/><br>Very little <input type="checkbox"/> (5) days                                                                                                                                                                                                                                                                                         |
| 53                                                   | How much time do you spend walking or using bicycle for at least 10 straight minutes to get to work?                                                                                  | Doesn't know <input type="checkbox"/> (6)<br>Hours: <input type="text"/> minutes: <input type="text"/><br>Refuses <input type="checkbox"/> (88)                                                                                                                                                                                                                                     |
| 40                                                   | Do you think a high salt diet can cause health problems?                                                                                                                              | Yes <input type="checkbox"/> (1)<br>No <input type="checkbox"/> (0)<br>Doesn't know <input type="checkbox"/> (3)<br>Refuses <input type="checkbox"/> (88)                                                                                                                                                                                                                           |
| 41                                                   | What kind of health problems do you think a high-salt diet can cause?<br>(Choose one or more)                                                                                         | High blood pressure <input type="checkbox"/> (1)<br>Osteoporosis <input type="checkbox"/> (2)<br>Stomach cancer <input type="checkbox"/> (3)<br>Kidney stones <input type="checkbox"/> (4)<br>None of the above <input type="checkbox"/> (5)<br>All of the above <input type="checkbox"/> (6)<br>Doesn't know <input type="checkbox"/> (7)<br>Refuses <input type="checkbox"/> (88) |
| 42                                                   | How important is salt/sodium in your diet?                                                                                                                                            | Not important <input type="checkbox"/>                                                                                                                                                                                                                                                                                                                                              |

|    |                                                                                            |                                                                                                                                                                                                                                                                                                                                                                                                                                                                                                                                                |
|----|--------------------------------------------------------------------------------------------|------------------------------------------------------------------------------------------------------------------------------------------------------------------------------------------------------------------------------------------------------------------------------------------------------------------------------------------------------------------------------------------------------------------------------------------------------------------------------------------------------------------------------------------------|
|    |                                                                                            | Of Little importance <input type="checkbox"/><br>Very important <input type="checkbox"/>                                                                                                                                                                                                                                                                                                                                                                                                                                                       |
| 43 | Do you regularly take action to reduce your salt intake?                                   | Yes <input type="checkbox"/> (1)<br>No <input type="checkbox"/> (2)<br>Doesn't know <input type="checkbox"/> (3)<br>Refuses <input type="checkbox"/> (88)                                                                                                                                                                                                                                                                                                                                                                                      |
| 44 | What actions do you take to reduce your salt/sodium intake?<br><i>(Choose one or more)</i> | Avoiding/reducing processed foods <input type="checkbox"/> (1)<br>Verifya sodium/salt content of food <input type="checkbox"/> (2)<br>Not adding salt at the table <input type="checkbox"/> (3)<br>Salt substitutes <input type="checkbox"/> (4)<br>Sodium substitutes <input type="checkbox"/> (5)<br>Not adding salt when cooking <input type="checkbox"/> (6)<br>Using spices when cooking <input type="checkbox"/> (7)<br>Avoid eating out <input type="checkbox"/> (8)<br>Other (specify) (9) _____<br>None <input type="checkbox"/> (10) |

| During free time |                                                                                                                                                                                                             |                                                                                                                                                                                                        |  |  |
|------------------|-------------------------------------------------------------------------------------------------------------------------------------------------------------------------------------------------------------|--------------------------------------------------------------------------------------------------------------------------------------------------------------------------------------------------------|--|--|
| 54               | During your free time, do you practice any intense sport or physical activity that imply a significant acceleration of hearth or breathing rate (running, football) for at least 10 straight minutes?       | Yes <input type="checkbox"/><br>(1)<br>No <input type="checkbox"/> (0)                                                                                                                                 |  |  |
| 55               | During a typical week, how many days do you have to carry out intense physical activity during your free time?                                                                                              | Number of days <table border="1" style="display: inline-table; vertical-align: middle;"> <tr> <td style="width: 20px; height: 20px;"></td> <td style="width: 20px; height: 20px;"></td> </tr> </table> |  |  |
|                  |                                                                                                                                                                                                             |                                                                                                                                                                                                        |  |  |
| 56               | During any of these days, how much time do you spend on these intense physical activities?                                                                                                                  | Hours:      Minutes:                                                                                                                                                                                   |  |  |
| 57               | During your free time, do you practice any moderate sport or physical activity that imply a slight acceleration of hearth or breathing rate (walking, biking, volleyball) for at least 10 straight minutes? | Yes <input type="checkbox"/><br>(1)<br>No <input type="checkbox"/> (0)                                                                                                                                 |  |  |
| 58               | During any of these days, how much time do you spend on these moderate physical activities?                                                                                                                 | Number of days <table border="1" style="display: inline-table; vertical-align: middle;"> <tr> <td style="width: 20px; height: 20px;"></td> <td style="width: 20px; height: 20px;"></td> </tr> </table> |  |  |
|                  |                                                                                                                                                                                                             |                                                                                                                                                                                                        |  |  |

|                                        |                                                                                                                                                                           |                                                                     |                                                                                                                                 |
|----------------------------------------|---------------------------------------------------------------------------------------------------------------------------------------------------------------------------|---------------------------------------------------------------------|---------------------------------------------------------------------------------------------------------------------------------|
| <b>Sedentary lifestyle</b>             |                                                                                                                                                                           |                                                                     |                                                                                                                                 |
| 63                                     | moderate physical activities?<br>During a typical day, how much time do you spend sitting or lying down? (exclude sleeping)                                               | Hours:                                                              | Minutes:                                                                                                                        |
| <b>Transportation during free time</b> |                                                                                                                                                                           |                                                                     |                                                                                                                                 |
| 60                                     | Do you walk or use bicycle for at least 10 straight minutes for transportation during your free time?                                                                     | Yes <input type="checkbox"/> (1)<br>No <input type="checkbox"/> (0) |                                                                                                                                 |
| <b>PERSONAL MEDICAL HISTORY</b>        |                                                                                                                                                                           |                                                                     |                                                                                                                                 |
|                                        | <b>Question</b>                                                                                                                                                           |                                                                     | <b>Answer</b>                                                                                                                   |
| 64                                     | Have you been diagnosed with heart failure?<br>How many days a week do you walk or use bicycle for at least 10 straight minutes for transportation during your free time? | Yes <input type="checkbox"/> (1)<br>No <input type="checkbox"/> (0) | (1) Number of days <table border="1" style="display: inline-table; width: 40px; height: 20px; vertical-align: middle;"></table> |
| 65                                     | Have you been diagnosed with myocardial infarction?                                                                                                                       | Yes <input type="checkbox"/> (1)<br>No <input type="checkbox"/> (0) |                                                                                                                                 |
| 62                                     | How much time do you spend walking or using bicycle for at least 10 straight minutes for transportation during your free time?                                            | Hours:                                                              | minutes:                                                                                                                        |
| 66                                     | Have you been diagnosed with a "heart condition"?                                                                                                                         | Yes <input type="checkbox"/> (1)<br>No <input type="checkbox"/> (0) |                                                                                                                                 |
|                                        |                                                                                                                                                                           | If yes, specify _____                                               |                                                                                                                                 |
| 67                                     | Have you been diagnosed with brain stroke?                                                                                                                                | Yes <input type="checkbox"/> (1)<br>No <input type="checkbox"/> (0) |                                                                                                                                 |
| 68                                     | Have you been diagnosed with kidney disease?                                                                                                                              | Yes <input type="checkbox"/> (1)<br>No <input type="checkbox"/> (0) |                                                                                                                                 |
| 69                                     | Have you been diagnosed with peptic ulcer?                                                                                                                                | Yes <input type="checkbox"/> (1)<br>No <input type="checkbox"/> (0) |                                                                                                                                 |
| 70                                     | Have you been diagnosed with liver disease?                                                                                                                               | Yes <input type="checkbox"/> (1)<br>No <input type="checkbox"/> (0) |                                                                                                                                 |
| 71                                     | Have you been diagnosed with cancer or malignant tumor?                                                                                                                   | Yes <input type="checkbox"/> (1)<br>No <input type="checkbox"/> (0) |                                                                                                                                 |

### 3 – Mediciones físicas

| MEASUREMENTS |                               |                                               |
|--------------|-------------------------------|-----------------------------------------------|
| 84           | Blood pressure, measurement 1 | Systolic (mmHg) ____<br>Diastolic (mmHg) ____ |
| 85           | Blood pressure, measurement 2 | Systolic (mmHg) ____                          |

| HYPERTENSION |                                                                                          |                                                                            |
|--------------|------------------------------------------------------------------------------------------|----------------------------------------------------------------------------|
| Question     |                                                                                          | Answer                                                                     |
| 73           | Have you ever had your blood pressure measured?                                          | Yes <input type="checkbox"/> (1) No <input type="checkbox"/> (0)           |
| DIABETES     |                                                                                          |                                                                            |
| 78           | Have you ever had your blood glucose measured?                                           | Yes <input type="checkbox"/> (1) No <input type="checkbox"/> (0)           |
| 86           | Blood pressure, measurement 3                                                            | Systolic (mmHg) <input type="text"/> Diastolic (mmHg) <input type="text"/> |
| 79           | Have you ever been told that you have high blood pressure?                               | Yes <input type="checkbox"/> (1) No <input type="checkbox"/> (0)           |
| 875          | Are you currently under any of the following treatments for high blood pressure?         | Yes <input type="checkbox"/> (1) No <input type="checkbox"/> (0)           |
| 80           | During the last 12 months?                                                               | Yes <input type="checkbox"/> (1) No <input type="checkbox"/> (0)           |
|              | Medications taken in the last two weeks                                                  | Yes <input type="checkbox"/> (1) No <input type="checkbox"/> (0)           |
|              | Measurement 2 salt intake                                                                | Yes <input type="checkbox"/> (1) No <input type="checkbox"/> (0)           |
| 81           | Are you currently under any of the following treatments for high blood glucose?          | Yes <input type="checkbox"/> (1) No <input type="checkbox"/> (0)           |
|              | Measurement 2 weight                                                                     | Yes <input type="checkbox"/> (1) No <input type="checkbox"/> (0)           |
|              | Advice to stop smoking                                                                   | Yes <input type="checkbox"/> (1) No <input type="checkbox"/> (0)           |
|              | Medications taken in the last two weeks                                                  | Yes <input type="checkbox"/> (1) No <input type="checkbox"/> (0)           |
|              | Advice to exercise more                                                                  | Yes <input type="checkbox"/> (1) No <input type="checkbox"/> (0)           |
| 76           | Advice to reduce salt intake                                                             | Yes <input type="checkbox"/> (1) No <input type="checkbox"/> (0)           |
|              | Have you ever seen a "healer" due to your high blood pressure?                           | Yes <input type="checkbox"/> (1) No <input type="checkbox"/> (0)           |
| 77           | Advice to lose weight                                                                    | Yes <input type="checkbox"/> (1) No <input type="checkbox"/> (0)           |
|              | Are you currently taking any herbs or alternative medicine to treat high blood pressure? | Yes <input type="checkbox"/> (1) No <input type="checkbox"/> (0)           |
|              | Advice to stop smoking                                                                   | Yes <input type="checkbox"/> (1) No <input type="checkbox"/> (0)           |
|              | Advice to exercise more                                                                  | Yes <input type="checkbox"/> (1) No <input type="checkbox"/> (0)           |
|              | Have you ever had your blood pressure measured                                           | Yes <input type="checkbox"/> (1) No <input type="checkbox"/> (0)           |
| 82           | Have you ever seen a "healer" due to your high blood glucose?                            | Yes <input type="checkbox"/> (1) No <input type="checkbox"/> (0)           |
| 83           | Are you currently taking any herbs or alternative medicine to treat high blood glucose?  | Yes <input type="checkbox"/> (1) No <input type="checkbox"/> (0)           |

| Risky eating behaviours |                                                                                      |                                                                                                                                                                                                                                                                      |
|-------------------------|--------------------------------------------------------------------------------------|----------------------------------------------------------------------------------------------------------------------------------------------------------------------------------------------------------------------------------------------------------------------|
| Question                |                                                                                      | Answer                                                                                                                                                                                                                                                               |
| 88                      | Have you ever had fear of getting fat?                                               | Never <input type="checkbox"/> (1)<br>Almost never <input type="checkbox"/> (2)<br>Sometimes <input type="checkbox"/> (3)<br>Frequently (2 times per week) <input type="checkbox"/> (4)<br>Very frequently (more than 3 times per week) <input type="checkbox"/> (5) |
| 89                      | Have you ever eaten more excessively with the feeling that you cannot stop doing it? | Never <input type="checkbox"/> (1)<br>Almost never <input type="checkbox"/> (2)<br>Sometimes <input type="checkbox"/> (3)<br>Frequently (2 times per week) <input type="checkbox"/> (4)<br>Very frequently                                                           |

|    |                                                                                                                   |                                                                                                                                                                                                                                                                               |
|----|-------------------------------------------------------------------------------------------------------------------|-------------------------------------------------------------------------------------------------------------------------------------------------------------------------------------------------------------------------------------------------------------------------------|
|    |                                                                                                                   | (more than 3 times per week) <input type="checkbox"/><br>(5)                                                                                                                                                                                                                  |
| 90 | Have you ever fasted o used any action to lower your weight like vomiting, using laxatives or excessive exercise? | Never <input type="checkbox"/> (1)<br>Almost never <input type="checkbox"/> (2)<br>Sometimes <input type="checkbox"/> (3)<br>Frequently (2 times per week) <input type="checkbox"/><br>(4)<br>Very frequently<br>(more than 3 times per week) <input type="checkbox"/><br>(5) |
| 91 | Have you ever been on a diet to lose weight?                                                                      | Never <input type="checkbox"/> (1)<br>Almost never <input type="checkbox"/> (2)<br>Sometimes <input type="checkbox"/> (3)<br>Frequently (2 times per week) <input type="checkbox"/><br>(4)<br>Very frequently<br>(more than 3 times per week) <input type="checkbox"/><br>(5) |
